# Supplementary material for: Prognostic impact of highly solid component in early-stage solid lung adenocarcinoma
Source: PubMed Central journal article supplement — Quant Imaging Med Surg. 2023 Jul 24;13(9):5641–52. doi: 10.21037/qims-23-36 (PMC10498257; doi:10.21037/qims-23-36), 2023-07-24
Supplement: qims-13-09-5641-coif.pdf [file qims-13-09-5641-coif.pdf]

## ICMJE DISCLOSURE FORM-1

Date: May 22<sup>th</sup>, 2023

Your Name: Taketo Kato

Manuscript Title: Prognostic Impact of Highly Solid Component in Early-Stage Solid Lung Adenocarcinoma

Manuscript number (if known): QIMS-23-36-R2

In the interest of transparency, we ask you to disclose all relationships/activities/interests listed below that are related to the content of your manuscript. "Related" means any relation with for-profit or not-for-profit third parties whose interests may be affected by the content of the manuscript. Disclosure represents a commitment to transparency and does not necessarily indicate a bias. If you are in doubt about whether to list a relationship/activity/interest, it is preferable that you do so.

The following questions apply to the author's relationships/activities/interests as they relate to the current manuscript only.

The author's relationships/activities/interests should be defined broadly. For example, if your manuscript pertains to the epidemiology of hypertension, you should declare all relationships with manufacturers of antihypertensive medication, even if that medication is not mentioned in the manuscript.

In item #1 below, report all support for the work reported in this manuscript without time limit. For all other items, the time frame for disclosure is the past 36 months.

|                                                           |                                                                                                                                                                         | Name all entities with whom you have this relationship or indicate none (add rows as needed) | Specifications/Comments (e.g., if payments were made to you or to your institution) |
|-----------------------------------------------------------|-------------------------------------------------------------------------------------------------------------------------------------------------------------------------|----------------------------------------------------------------------------------------------|-------------------------------------------------------------------------------------|
| <b>Time frame: Since the initial planning of the work</b> |                                                                                                                                                                         |                                                                                              |                                                                                     |
| 1                                                         | All support for the present manuscript (e.g., funding, provision of study materials, medical writing, article processing charges, etc.)<br>No time limit for this item. | ____ None                                                                                    |                                                                                     |
|                                                           |                                                                                                                                                                         |                                                                                              |                                                                                     |
|                                                           |                                                                                                                                                                         |                                                                                              |                                                                                     |
|                                                           |                                                                                                                                                                         |                                                                                              |                                                                                     |
|                                                           |                                                                                                                                                                         |                                                                                              |                                                                                     |
|                                                           |                                                                                                                                                                         |                                                                                              |                                                                                     |
| <b>Time frame: past 36 months</b>                         |                                                                                                                                                                         |                                                                                              |                                                                                     |
| 2                                                         | Grants or contracts from any entity (if not indicated)                                                                                                                  | ____ None                                                                                    |                                                                                     |
|                                                           |                                                                                                                                                                         |                                                                                              |                                                                                     |

|    |                                                                                                              |          |  |
|----|--------------------------------------------------------------------------------------------------------------|----------|--|
|    | in item #1 above).                                                                                           |          |  |
| 3  | Royalties or licenses                                                                                        | ___ None |  |
|    |                                                                                                              |          |  |
|    |                                                                                                              |          |  |
| 4  | Consulting fees                                                                                              | ___ None |  |
|    |                                                                                                              |          |  |
|    |                                                                                                              |          |  |
| 5  | Payment or honoraria for lectures, presentations, speakers bureaus, manuscript writing or educational events | ___ None |  |
|    |                                                                                                              |          |  |
|    |                                                                                                              |          |  |
| 6  | Payment for expert testimony                                                                                 | ___ None |  |
|    |                                                                                                              |          |  |
|    |                                                                                                              |          |  |
| 7  | Support for attending meetings and/or travel                                                                 | ___ None |  |
|    |                                                                                                              |          |  |
|    |                                                                                                              |          |  |
| 8  | Patents planned, issued or pending                                                                           | ___ None |  |
|    |                                                                                                              |          |  |
|    |                                                                                                              |          |  |
| 9  | Participation on a Data Safety Monitoring Board or Advisory Board                                            | ___ None |  |
|    |                                                                                                              |          |  |
|    |                                                                                                              |          |  |
| 10 | Leadership or fiduciary role in other board, society, committee or advocacy group, paid or unpaid            | ___ None |  |
|    |                                                                                                              |          |  |
|    |                                                                                                              |          |  |
| 11 | Stock or stock options                                                                                       | ___ None |  |
|    |                                                                                                              |          |  |
|    |                                                                                                              |          |  |
| 12 | Receipt of equipment, materials, drugs, medical writing, gifts or other services                             | ___ None |  |
|    |                                                                                                              |          |  |
|    |                                                                                                              |          |  |
| 13 | Other financial or non-financial interests                                                                   | ___ None |  |
|    |                                                                                                              |          |  |
|    |                                                                                                              |          |  |

Please summarize the above conflict of interest in the following box:

None.

Please place an "X" next to the following statement to indicate your agreement:

  X   I certify that I have answered every question and have not altered the wording of any of the questions on this form.

ICMJE DISCLOSURE FORM-2

Date: May22<sup>th</sup>, 2023

Your Name: Shingo Iwano

Manuscript Title: Prognostic Impact of Highly Solid Component in Early-Stage Solid Lung Adenocarcinoma

Manuscript number (if known): QIMS-23-36-R2

In the interest of transparency, we ask you to disclose all relationships/activities/interests listed below that are related to the content of your manuscript. "Related" means any relation with for-profit or not-for-profit third parties whose interests may be affected by the content of the manuscript. Disclosure represents a commitment to transparency and does not necessarily indicate a bias. If you are in doubt about whether to list a relationship/activity/interest, it is preferable that you do so.

The following questions apply to the author's relationships/activities/interests as they relate to the current manuscript only.

The author's relationships/activities/interests should be defined broadly. For example, if your manuscript pertains to the epidemiology of hypertension, you should declare all relationships with manufacturers of antihypertensive medication, even if that medication is not mentioned in the manuscript.

In item #1 below, report all support for the work reported in this manuscript without time limit. For all other items, the time frame for disclosure is the past 36 months.

|                                                    |                                               | Name all entities with whom you have this relationship or indicate none (add rows as needed) | Specifications/Comments (e.g., if payments were made to you or to your institution) |
|----------------------------------------------------|-----------------------------------------------|----------------------------------------------------------------------------------------------|-------------------------------------------------------------------------------------|
| Time frame: Since the initial planning of the work |                                               |                                                                                              |                                                                                     |
| 1                                                  | All support for the present manuscript (e.g., | None                                                                                         |                                                                                     |

|                                   |                                                                                                                           |          |  |
|-----------------------------------|---------------------------------------------------------------------------------------------------------------------------|----------|--|
|                                   | funding, provision of study materials, medical writing, article processing charges, etc.)<br>No time limit for this item. |          |  |
| <b>Time frame: past 36 months</b> |                                                                                                                           |          |  |
| 2                                 | Grants or contracts from any entity (if not indicated in item #1 above).                                                  | ___ None |  |
| 3                                 | Royalties or licenses                                                                                                     | ___ None |  |
| 4                                 | Consulting fees                                                                                                           | ___ None |  |
| 5                                 | Payment or honoraria for lectures, presentations, speakers bureaus, manuscript writing or educational events              | ___ None |  |
| 6                                 | Payment for expert testimony                                                                                              | ___ None |  |
| 7                                 | Support for attending meetings and/or travel                                                                              | ___ None |  |
| 8                                 | Patents planned, issued or pending                                                                                        | ___ None |  |
| 9                                 | Participation on a Data Safety Monitoring Board or Advisory Board                                                         | ___ None |  |
| 10                                | Leadership or fiduciary role in other board, society, committee or advocacy group, paid or unpaid                         | ___ None |  |
| 11                                | Stock or stock options                                                                                                    | ___ None |  |
| 12                                | Receipt of equipment, materials, drugs, medical writing, gifts or other services                                          | ___ None |  |
| 13                                | Other financial or non-financial interests                                                                                | ___ None |  |

Please summarize the above conflict of interest in the following box:

None.

Please place an "X" next to the following statement to indicate your agreement:

I certify that I have answered every question and have not altered the wording of any of the questions on this form.

### ICMJE DISCLOSURE FORM-3

Date: May 22<sup>th</sup>, 2023

Your Name: Yuki Hanamatsu

Manuscript Title: Prognostic Impact of Highly Solid Component in Early-Stage Solid Lung Adenocarcinoma

Manuscript number (if known): QIMS-23-36-R2

In the interest of transparency, we ask you to disclose all relationships/activities/interests listed below that are related to the content of your manuscript. "Related" means any relation with for-profit or not-for-profit third parties whose interests may be affected by the content of the manuscript. Disclosure represents a commitment to transparency and does not necessarily indicate a bias. If you are in doubt about whether to list a relationship/activity/interest, it is preferable that you do so.

The following questions apply to the author's relationships/activities/interests as they relate to the current manuscript only.

The author's relationships/activities/interests should be defined broadly. For example, if your manuscript pertains to the epidemiology of hypertension, you should declare all relationships with manufacturers of antihypertensive medication, even if that medication is not mentioned in the manuscript.

In item #1 below, report all support for the work reported in this manuscript without time limit. For all other items, the time frame for disclosure is the past 36 months.

|                                                    |                                                                                                                                                                         | Name all entities with whom you have this relationship or indicate none (add rows as needed) | Specifications/Comments (e.g., if payments were made to you or to your institution) |
|----------------------------------------------------|-------------------------------------------------------------------------------------------------------------------------------------------------------------------------|----------------------------------------------------------------------------------------------|-------------------------------------------------------------------------------------|
| Time frame: Since the initial planning of the work |                                                                                                                                                                         |                                                                                              |                                                                                     |
| 1                                                  | All support for the present manuscript (e.g., funding, provision of study materials, medical writing, article processing charges, etc.)<br>No time limit for this item. | ____ None                                                                                    |                                                                                     |
| Time frame: past 36 months                         |                                                                                                                                                                         |                                                                                              |                                                                                     |
| 2                                                  | Grants or contracts from any entity (if not indicated in item #1 above).                                                                                                | ____ None                                                                                    |                                                                                     |
| 3                                                  | Royalties or licenses                                                                                                                                                   | ____ None                                                                                    |                                                                                     |
| 4                                                  | Consulting fees                                                                                                                                                         | ____ None                                                                                    |                                                                                     |
| 5                                                  | Payment or honoraria for lectures, presentations, speakers bureaus, manuscript writing or educational events                                                            | ____ None                                                                                    |                                                                                     |
| 6                                                  | Payment for expert testimony                                                                                                                                            | ____ None                                                                                    |                                                                                     |
| 7                                                  | Support for attending meetings and/or travel                                                                                                                            | ____ None                                                                                    |                                                                                     |
| 8                                                  | Patents planned, issued or pending                                                                                                                                      | ____ None                                                                                    |                                                                                     |
| 9                                                  | Participation on a Data Safety Monitoring Board or Advisory Board                                                                                                       | ____ None                                                                                    |                                                                                     |
| 10                                                 | Leadership or fiduciary role in other board, society, committee or advocacy group, paid or unpaid                                                                       | ____ None                                                                                    |                                                                                     |
| 11                                                 | Stock or stock options                                                                                                                                                  | ____ None                                                                                    |                                                                                     |

|    |                                                                                  |          |  |
|----|----------------------------------------------------------------------------------|----------|--|
| 12 | Receipt of equipment, materials, drugs, medical writing, gifts or other services | ___ None |  |
|    |                                                                                  |          |  |
|    |                                                                                  |          |  |
| 13 | Other financial or non-financial interests                                       | ___ None |  |
|    |                                                                                  |          |  |
|    |                                                                                  |          |  |

Please summarize the above conflict of interest in the following box:

None.

Please place an "X" next to the following statement to indicate your agreement:

I certify that I have answered every question and have not altered the wording of any of the questions on this form.

ICMJE DISCLOSURE FORM-4

Date: May 22<sup>th</sup>, 2023

Your Name: Masato Nakaguro

Manuscript Title: Prognostic Impact of Highly Solid Component in Early-Stage Solid Lung Adenocarcinoma

Manuscript number (if known): QIMS-23-36-R2

In the interest of transparency, we ask you to disclose all relationships/activities/interests listed below that are related to the content of your manuscript. "Related" means any relation with for-profit or not-for-profit third parties whose interests may be affected by the content of the manuscript. Disclosure represents a commitment to transparency and does not necessarily indicate a bias. If you are in doubt about whether to list a relationship/activity/interest, it is preferable that you do so.

The following questions apply to the author's relationships/activities/interests as they relate to the current manuscript only.

The author's relationships/activities/interests should be defined broadly. For example, if your manuscript pertains

to the epidemiology of hypertension, you should declare all relationships with manufacturers of antihypertensive medication, even if that medication is not mentioned in the manuscript.

In item #1 below, report all support for the work reported in this manuscript without time limit. For all other items, the time frame for disclosure is the past 36 months.

|                                                           |                                                                                                                                                                         | Name all entities with whom you have this relationship or indicate none (add rows as needed) | Specifications/Comments (e.g., if payments were made to you or to your institution) |
|-----------------------------------------------------------|-------------------------------------------------------------------------------------------------------------------------------------------------------------------------|----------------------------------------------------------------------------------------------|-------------------------------------------------------------------------------------|
| <b>Time frame: Since the initial planning of the work</b> |                                                                                                                                                                         |                                                                                              |                                                                                     |
| 1                                                         | All support for the present manuscript (e.g., funding, provision of study materials, medical writing, article processing charges, etc.)<br>No time limit for this item. | ___ None                                                                                     |                                                                                     |
|                                                           |                                                                                                                                                                         |                                                                                              |                                                                                     |
|                                                           |                                                                                                                                                                         |                                                                                              |                                                                                     |
|                                                           |                                                                                                                                                                         |                                                                                              |                                                                                     |
|                                                           |                                                                                                                                                                         |                                                                                              |                                                                                     |
| <b>Time frame: past 36 months</b>                         |                                                                                                                                                                         |                                                                                              |                                                                                     |
| 2                                                         | Grants or contracts from any entity (if not indicated in item #1 above).                                                                                                | ___ None                                                                                     |                                                                                     |
|                                                           |                                                                                                                                                                         |                                                                                              |                                                                                     |
| 3                                                         | Royalties or licenses                                                                                                                                                   | ___ None                                                                                     |                                                                                     |
|                                                           |                                                                                                                                                                         |                                                                                              |                                                                                     |
| 4                                                         | Consulting fees                                                                                                                                                         | ___ None                                                                                     |                                                                                     |
|                                                           |                                                                                                                                                                         |                                                                                              |                                                                                     |
| 5                                                         | Payment or honoraria for lectures, presentations, speakers bureaus, manuscript writing or educational events                                                            | ___ None                                                                                     |                                                                                     |
|                                                           |                                                                                                                                                                         |                                                                                              |                                                                                     |
| 6                                                         | Payment for expert testimony                                                                                                                                            | ___ None                                                                                     |                                                                                     |
|                                                           |                                                                                                                                                                         |                                                                                              |                                                                                     |
| 7                                                         | Support for attending meetings and/or travel                                                                                                                            | ___ None                                                                                     |                                                                                     |
|                                                           |                                                                                                                                                                         |                                                                                              |                                                                                     |
| 8                                                         | Patents planned, issued or pending                                                                                                                                      | ___ None                                                                                     |                                                                                     |
|                                                           |                                                                                                                                                                         |                                                                                              |                                                                                     |
| 9                                                         | Participation on a Data Safety Monitoring Board or Advisory Board                                                                                                       | ___ None                                                                                     |                                                                                     |
|                                                           |                                                                                                                                                                         |                                                                                              |                                                                                     |



|    |                                                                                                   |          |  |
|----|---------------------------------------------------------------------------------------------------|----------|--|
| 10 | Leadership or fiduciary role in other board, society, committee or advocacy group, paid or unpaid | ___ None |  |
|    |                                                                                                   |          |  |
|    |                                                                                                   |          |  |
| 11 | Stock or stock options                                                                            | ___ None |  |
|    |                                                                                                   |          |  |
|    |                                                                                                   |          |  |
| 12 | Receipt of equipment, materials, drugs, medical writing, gifts or other services                  | ___ None |  |
|    |                                                                                                   |          |  |
|    |                                                                                                   |          |  |
| 13 | Other financial or non-financial interests                                                        | ___ None |  |
|    |                                                                                                   |          |  |
|    |                                                                                                   |          |  |

Please summarize the above conflict of interest in the following box:

None.

Please place an "X" next to the following statement to indicate your agreement:

I certify that I have answered every question and have not altered the wording of any of the questions on this form.

ICMJE DISCLOSURE FORM-5

Date: May 22<sup>th</sup>, 2023

Your Name: Ryo Emoto

Manuscript Title: Prognostic Impact of Highly Solid Component in Early-Stage Solid Lung Adenocarcinoma

Manuscript number (if known): QIMS-23-36-R2

In the interest of transparency, we ask you to disclose all relationships/activities/interests listed below that are related to the content of your manuscript. "Related" means any relation with for-profit or not-for-profit third parties whose interests may be affected by the content of the manuscript. Disclosure represents a commitment

to transparency and does not necessarily indicate a bias. If you are in doubt about whether to list a relationship/activity/interest, it is preferable that you do so.

The following questions apply to the author’s relationships/activities/interests as they relate to the current manuscript only.

The author’s relationships/activities/interests should be defined broadly. For example, if your manuscript pertains to the epidemiology of hypertension, you should declare all relationships with manufacturers of antihypertensive medication, even if that medication is not mentioned in the manuscript.

In item #1 below, report all support for the work reported in this manuscript without time limit. For all other items, the time frame for disclosure is the past 36 months.

|                                                           |                                                                                                                                                                         | Name all entities with whom you have this relationship or indicate none (add rows as needed) | Specifications/Comments (e.g., if payments were made to you or to your institution) |
|-----------------------------------------------------------|-------------------------------------------------------------------------------------------------------------------------------------------------------------------------|----------------------------------------------------------------------------------------------|-------------------------------------------------------------------------------------|
| <b>Time frame: Since the initial planning of the work</b> |                                                                                                                                                                         |                                                                                              |                                                                                     |
| 1                                                         | All support for the present manuscript (e.g., funding, provision of study materials, medical writing, article processing charges, etc.)<br>No time limit for this item. | ___ None                                                                                     |                                                                                     |
|                                                           |                                                                                                                                                                         |                                                                                              |                                                                                     |
|                                                           |                                                                                                                                                                         |                                                                                              |                                                                                     |
|                                                           |                                                                                                                                                                         |                                                                                              |                                                                                     |
|                                                           |                                                                                                                                                                         |                                                                                              |                                                                                     |
| <b>Time frame: past 36 months</b>                         |                                                                                                                                                                         |                                                                                              |                                                                                     |
| 2                                                         | Grants or contracts from any entity (if not indicated in item #1 above).                                                                                                | ___ None                                                                                     |                                                                                     |
|                                                           |                                                                                                                                                                         |                                                                                              |                                                                                     |
| 3                                                         | Royalties or licenses                                                                                                                                                   | ___ None                                                                                     |                                                                                     |
|                                                           |                                                                                                                                                                         |                                                                                              |                                                                                     |
| 4                                                         | Consulting fees                                                                                                                                                         | ___ None                                                                                     |                                                                                     |
|                                                           |                                                                                                                                                                         |                                                                                              |                                                                                     |
| 5                                                         | Payment or honoraria for lectures, presentations, speakers bureaus, manuscript writing or educational events                                                            | ___ None                                                                                     |                                                                                     |
|                                                           |                                                                                                                                                                         |                                                                                              |                                                                                     |
| 6                                                         | Payment for expert testimony                                                                                                                                            | ___ None                                                                                     |                                                                                     |
|                                                           |                                                                                                                                                                         |                                                                                              |                                                                                     |
| 7                                                         | Support for attending                                                                                                                                                   | ___ None                                                                                     |                                                                                     |

|    |                                                                                                   |                  |  |
|----|---------------------------------------------------------------------------------------------------|------------------|--|
|    | meetings and/or travel                                                                            |                  |  |
| 8  | Patents planned, issued or pending                                                                | <u>    </u> None |  |
| 9  | Participation on a Data Safety Monitoring Board or Advisory Board                                 | <u>    </u> None |  |
| 10 | Leadership or fiduciary role in other board, society, committee or advocacy group, paid or unpaid | <u>    </u> None |  |
| 11 | Stock or stock options                                                                            | <u>    </u> None |  |
| 12 | Receipt of equipment, materials, drugs, medical writing, gifts or other services                  | <u>    </u> None |  |
| 13 | Other financial or non-financial interests                                                        | <u>    </u> None |  |

Please summarize the above conflict of interest in the following box:

None.

Please place an "X" next to the following statement to indicate your agreement:

I certify that I have answered every question and have not altered the wording of any of the questions on this form.

ICMJE DISCLOSURE FORM-6

Date: May 22<sup>th</sup>, 2023

Your Name: Shoji Okado

Manuscript Title: Prognostic Impact of Highly Solid Component in Early-Stage Solid Lung Adenocarcinoma

Manuscript number (if known): QIMS-23-36-R2

In the interest of transparency, we ask you to disclose all relationships/activities/interests listed below that are related to the content of your manuscript. "Related" means any relation with for-profit or not-for-profit third parties whose interests may be affected by the content of the manuscript. Disclosure represents a commitment to transparency and does not necessarily indicate a bias. If you are in doubt about whether to list a relationship/activity/interest, it is preferable that you do so.

The following questions apply to the author's relationships/activities/interests as they relate to the current manuscript only.

The author's relationships/activities/interests should be defined broadly. For example, if your manuscript pertains to the epidemiology of hypertension, you should declare all relationships with manufacturers of antihypertensive medication, even if that medication is not mentioned in the manuscript.

In item #1 below, report all support for the work reported in this manuscript without time limit. For all other items, the time frame for disclosure is the past 36 months.

|                                                           |                                                                                                                                                                         | Name all entities with whom you have this relationship or indicate none (add rows as needed) | Specifications/Comments (e.g., if payments were made to you or to your institution) |
|-----------------------------------------------------------|-------------------------------------------------------------------------------------------------------------------------------------------------------------------------|----------------------------------------------------------------------------------------------|-------------------------------------------------------------------------------------|
| <b>Time frame: Since the initial planning of the work</b> |                                                                                                                                                                         |                                                                                              |                                                                                     |
| 1                                                         | All support for the present manuscript (e.g., funding, provision of study materials, medical writing, article processing charges, etc.)<br>No time limit for this item. | ___ None                                                                                     |                                                                                     |
| <b>Time frame: past 36 months</b>                         |                                                                                                                                                                         |                                                                                              |                                                                                     |
| 2                                                         | Grants or contracts from any entity (if not indicated in item #1 above).                                                                                                | ___ None                                                                                     |                                                                                     |
| 3                                                         | Royalties or licenses                                                                                                                                                   | ___ None                                                                                     |                                                                                     |
| 4                                                         | Consulting fees                                                                                                                                                         | ___ None                                                                                     |                                                                                     |
| 5                                                         | Payment or honoraria for                                                                                                                                                | ___ None                                                                                     |                                                                                     |

|    |                                                                                                   |          |  |
|----|---------------------------------------------------------------------------------------------------|----------|--|
|    | lectures, presentations, speakers bureaus, manuscript writing or educational events               |          |  |
| 6  | Payment for expert testimony                                                                      | ___ None |  |
| 7  | Support for attending meetings and/or travel                                                      | ___ None |  |
| 8  | Patents planned, issued or pending                                                                | ___ None |  |
| 9  | Participation on a Data Safety Monitoring Board or Advisory Board                                 | ___ None |  |
| 10 | Leadership or fiduciary role in other board, society, committee or advocacy group, paid or unpaid | ___ None |  |
| 11 | Stock or stock options                                                                            | ___ None |  |
| 12 | Receipt of equipment, materials, drugs, medical writing, gifts or other services                  | ___ None |  |
| 13 | Other financial or non-financial interests                                                        | ___ None |  |

Please summarize the above conflict of interest in the following box:

None.

Please place an "X" next to the following statement to indicate your agreement:

I certify that I have answered every question and have not altered the wording of any of the questions on this

form.

## ICMJE DISCLOSURE FORM-7

Date: May 22<sup>th</sup>, 2023

Your Name: Keiyu Sato

Manuscript Title: Prognostic Impact of Highly Solid Component in Early-Stage Solid Lung Adenocarcinoma

Manuscript number (if known): QIMS-23-36-R2

In the interest of transparency, we ask you to disclose all relationships/activities/interests listed below that are related to the content of your manuscript. "Related" means any relation with for-profit or not-for-profit third parties whose interests may be affected by the content of the manuscript. Disclosure represents a commitment to transparency and does not necessarily indicate a bias. If you are in doubt about whether to list a relationship/activity/interest, it is preferable that you do so.

The following questions apply to the author's relationships/activities/interests as they relate to the current manuscript only.

The author's relationships/activities/interests should be defined broadly. For example, if your manuscript pertains to the epidemiology of hypertension, you should declare all relationships with manufacturers of antihypertensive medication, even if that medication is not mentioned in the manuscript.

In item #1 below, report all support for the work reported in this manuscript without time limit. For all other items, the time frame for disclosure is the past 36 months.

|                                                    |                                                                                                                                                                         | Name all entities with whom you have this relationship or indicate none (add rows as needed) | Specifications/Comments (e.g., if payments were made to you or to your institution) |
|----------------------------------------------------|-------------------------------------------------------------------------------------------------------------------------------------------------------------------------|----------------------------------------------------------------------------------------------|-------------------------------------------------------------------------------------|
| Time frame: Since the initial planning of the work |                                                                                                                                                                         |                                                                                              |                                                                                     |
| 1                                                  | All support for the present manuscript (e.g., funding, provision of study materials, medical writing, article processing charges, etc.)<br>No time limit for this item. | ____ None                                                                                    |                                                                                     |
| Time frame: past 36 months                         |                                                                                                                                                                         |                                                                                              |                                                                                     |
| 2                                                  | Grants or contracts from                                                                                                                                                | ____ None                                                                                    |                                                                                     |

|    |                                                                                                              |          |  |
|----|--------------------------------------------------------------------------------------------------------------|----------|--|
|    | any entity (if not indicated in item #1 above).                                                              |          |  |
| 3  | Royalties or licenses                                                                                        | ___ None |  |
| 4  | Consulting fees                                                                                              | ___ None |  |
| 5  | Payment or honoraria for lectures, presentations, speakers bureaus, manuscript writing or educational events | ___ None |  |
| 6  | Payment for expert testimony                                                                                 | ___ None |  |
| 7  | Support for attending meetings and/or travel                                                                 | ___ None |  |
| 8  | Patents planned, issued or pending                                                                           | ___ None |  |
| 9  | Participation on a Data Safety Monitoring Board or Advisory Board                                            | ___ None |  |
| 10 | Leadership or fiduciary role in other board, society, committee or advocacy group, paid or unpaid            | ___ None |  |
| 11 | Stock or stock options                                                                                       | ___ None |  |
| 12 | Receipt of equipment, materials, drugs, medical writing, gifts or other services                             | ___ None |  |
| 13 | Other financial or non-financial interests                                                                   | ___ None |  |

Please summarize the above conflict of interest in the following box:

None.

Please place an "X" next to the following statement to indicate your agreement:

I certify that I have answered every question and have not altered the wording of any of the questions on this form.

### ICMJE DISCLOSURE FORM-8

Date: May 22<sup>th</sup>, 2023

Your Name: Osamu Noritake

Manuscript Title: Prognostic Impact of Highly Solid Component in Early-Stage Solid Lung Adenocarcinoma

Manuscript number (if known): QIMS-23-36-R2

In the interest of transparency, we ask you to disclose all relationships/activities/interests listed below that are related to the content of your manuscript. "Related" means any relation with for-profit or not-for-profit third parties whose interests may be affected by the content of the manuscript. Disclosure represents a commitment to transparency and does not necessarily indicate a bias. If you are in doubt about whether to list a relationship/activity/interest, it is preferable that you do so.

The following questions apply to the author's relationships/activities/interests as they relate to the current manuscript only.

The author's relationships/activities/interests should be defined broadly. For example, if your manuscript pertains to the epidemiology of hypertension, you should declare all relationships with manufacturers of antihypertensive medication, even if that medication is not mentioned in the manuscript.

In item #1 below, report all support for the work reported in this manuscript without time limit. For all other items, the time frame for disclosure is the past 36 months.

|                                                    |                     | Name all entities with whom you have this relationship or indicate none (add rows as needed) | Specifications/Comments (e.g., if payments were made to you or to your institution) |
|----------------------------------------------------|---------------------|----------------------------------------------------------------------------------------------|-------------------------------------------------------------------------------------|
| Time frame: Since the initial planning of the work |                     |                                                                                              |                                                                                     |
| 1                                                  | All support for the | None                                                                                         |                                                                                     |



|                                   |                                                                                                                                                     |          |  |
|-----------------------------------|-----------------------------------------------------------------------------------------------------------------------------------------------------|----------|--|
|                                   | present manuscript (e.g., funding, provision of study materials, medical writing, article processing charges, etc.)<br>No time limit for this item. |          |  |
| <b>Time frame: past 36 months</b> |                                                                                                                                                     |          |  |
| 2                                 | Grants or contracts from any entity (if not indicated in item #1 above).                                                                            | ___ None |  |
| 3                                 | Royalties or licenses                                                                                                                               | ___ None |  |
| 4                                 | Consulting fees                                                                                                                                     | ___ None |  |
| 5                                 | Payment or honoraria for lectures, presentations, speakers bureaus, manuscript writing or educational events                                        | ___ None |  |
| 6                                 | Payment for expert testimony                                                                                                                        | ___ None |  |
| 7                                 | Support for attending meetings and/or travel                                                                                                        | ___ None |  |
| 8                                 | Patents planned, issued or pending                                                                                                                  | ___ None |  |
| 9                                 | Participation on a Data Safety Monitoring Board or Advisory Board                                                                                   | ___ None |  |
| 10                                | Leadership or fiduciary role in other board, society, committee or advocacy group, paid or unpaid                                                   | ___ None |  |
| 11                                | Stock or stock options                                                                                                                              | ___ None |  |
| 12                                | Receipt of equipment, materials, drugs, medical writing, gifts or other services                                                                    | ___ None |  |
| 13                                | Other financial or non-financial interests                                                                                                          | ___ None |  |

Please summarize the above conflict of interest in the following box:

|       |
|-------|
| None. |
|-------|

Please place an "X" next to the following statement to indicate your agreement:

I certify that I have answered every question and have not altered the wording of any of the questions on this form.

### ICMJE DISCLOSURE FORM-9

Date: May 22<sup>th</sup>, 2023

Your Name: Keita Nakanishi

Manuscript Title: Prognostic Impact of Highly Solid Component in Early-Stage Solid Lung Adenocarcinoma

Manuscript number (if known): QIMS-23-36-R2

In the interest of transparency, we ask you to disclose all relationships/activities/interests listed below that are related to the content of your manuscript. "Related" means any relation with for-profit or not-for-profit third parties whose interests may be affected by the content of the manuscript. Disclosure represents a commitment to transparency and does not necessarily indicate a bias. If you are in doubt about whether to list a relationship/activity/interest, it is preferable that you do so.

The following questions apply to the author's relationships/activities/interests as they relate to the current manuscript only.

The author's relationships/activities/interests should be defined broadly. For example, if your manuscript pertains to the epidemiology of hypertension, you should declare all relationships with manufacturers of antihypertensive medication, even if that medication is not mentioned in the manuscript.

In item #1 below, report all support for the work reported in this manuscript without time limit. For all other items, the time frame for disclosure is the past 36 months.

|                                                    |                                                                                                                                                                         | Name all entities with whom you have this relationship or indicate none (add rows as needed) | Specifications/Comments (e.g., if payments were made to you or to your institution) |
|----------------------------------------------------|-------------------------------------------------------------------------------------------------------------------------------------------------------------------------|----------------------------------------------------------------------------------------------|-------------------------------------------------------------------------------------|
| Time frame: Since the initial planning of the work |                                                                                                                                                                         |                                                                                              |                                                                                     |
| 1                                                  | All support for the present manuscript (e.g., funding, provision of study materials, medical writing, article processing charges, etc.)<br>No time limit for this item. | ___ None                                                                                     |                                                                                     |
|                                                    |                                                                                                                                                                         |                                                                                              |                                                                                     |
|                                                    |                                                                                                                                                                         |                                                                                              |                                                                                     |
|                                                    |                                                                                                                                                                         |                                                                                              |                                                                                     |
|                                                    |                                                                                                                                                                         |                                                                                              |                                                                                     |
| Time frame: past 36 months                         |                                                                                                                                                                         |                                                                                              |                                                                                     |
| 2                                                  | Grants or contracts from any entity (if not indicated in item #1 above).                                                                                                | ___ None                                                                                     |                                                                                     |
|                                                    |                                                                                                                                                                         |                                                                                              |                                                                                     |
|                                                    |                                                                                                                                                                         |                                                                                              |                                                                                     |
| 3                                                  | Royalties or licenses                                                                                                                                                   | ___ None                                                                                     |                                                                                     |
|                                                    |                                                                                                                                                                         |                                                                                              |                                                                                     |
|                                                    |                                                                                                                                                                         |                                                                                              |                                                                                     |
| 4                                                  | Consulting fees                                                                                                                                                         | ___ None                                                                                     |                                                                                     |
|                                                    |                                                                                                                                                                         |                                                                                              |                                                                                     |
|                                                    |                                                                                                                                                                         |                                                                                              |                                                                                     |
| 5                                                  | Payment or honoraria for lectures, presentations, speakers bureaus, manuscript writing or educational events                                                            | ___ None                                                                                     |                                                                                     |
|                                                    |                                                                                                                                                                         |                                                                                              |                                                                                     |
|                                                    |                                                                                                                                                                         |                                                                                              |                                                                                     |
| 6                                                  | Payment for expert testimony                                                                                                                                            | ___ None                                                                                     |                                                                                     |
|                                                    |                                                                                                                                                                         |                                                                                              |                                                                                     |
|                                                    |                                                                                                                                                                         |                                                                                              |                                                                                     |
| 7                                                  | Support for attending meetings and/or travel                                                                                                                            | ___ None                                                                                     |                                                                                     |
|                                                    |                                                                                                                                                                         |                                                                                              |                                                                                     |
|                                                    |                                                                                                                                                                         |                                                                                              |                                                                                     |
| 8                                                  | Patents planned, issued or pending                                                                                                                                      | ___ None                                                                                     |                                                                                     |
|                                                    |                                                                                                                                                                         |                                                                                              |                                                                                     |
|                                                    |                                                                                                                                                                         |                                                                                              |                                                                                     |
| 9                                                  | Participation on a Data Safety Monitoring Board or Advisory Board                                                                                                       | ___ None                                                                                     |                                                                                     |
|                                                    |                                                                                                                                                                         |                                                                                              |                                                                                     |
|                                                    |                                                                                                                                                                         |                                                                                              |                                                                                     |
| 10                                                 | Leadership or fiduciary role in other board, society, committee or advocacy group, paid or unpaid                                                                       | ___ None                                                                                     |                                                                                     |
|                                                    |                                                                                                                                                                         |                                                                                              |                                                                                     |
|                                                    |                                                                                                                                                                         |                                                                                              |                                                                                     |
| 11                                                 | Stock or stock options                                                                                                                                                  | ___ None                                                                                     |                                                                                     |
|                                                    |                                                                                                                                                                         |                                                                                              |                                                                                     |
|                                                    |                                                                                                                                                                         |                                                                                              |                                                                                     |

|    |                                                                                  |           |  |
|----|----------------------------------------------------------------------------------|-----------|--|
|    |                                                                                  |           |  |
| 12 | Receipt of equipment, materials, drugs, medical writing, gifts or other services | ____ None |  |
|    |                                                                                  |           |  |
|    |                                                                                  |           |  |
| 13 | Other financial or non-financial interests                                       | ____ None |  |
|    |                                                                                  |           |  |
|    |                                                                                  |           |  |

Please summarize the above conflict of interest in the following box:

None.

Please place an "X" next to the following statement to indicate your agreement:

I certify that I have answered every question and have not altered the wording of any of the questions on this form.

ICMJE DISCLOSURE FORM-10

Date: May 22<sup>th</sup>, 2023

Your Name: Yuka Kadomatsu

Manuscript Title: Prognostic Impact of Highly Solid Component in Early-Stage Solid Lung Adenocarcinoma

Manuscript number (if known): QIMS-23-36-R2

In the interest of transparency, we ask you to disclose all relationships/activities/interests listed below that are related to the content of your manuscript. "Related" means any relation with for-profit or not-for-profit third parties whose interests may be affected by the content of the manuscript. Disclosure represents a commitment to transparency and does not necessarily indicate a bias. If you are in doubt about whether to list a relationship/activity/interest, it is preferable that you do so.

The following questions apply to the author's relationships/activities/interests as they relate to the current manuscript only.

The author's relationships/activities/interests should be defined broadly. For example, if your manuscript pertains to the epidemiology of hypertension, you should declare all relationships with manufacturers of antihypertensive medication, even if that medication is not mentioned in the manuscript.

In item #1 below, report all support for the work reported in this manuscript without time limit. For all other items, the time frame for disclosure is the past 36 months.

|                                                    |                                                                                                                                                                         | Name all entities with whom you have this relationship or indicate none (add rows as needed) | Specifications/Comments (e.g., if payments were made to you or to your institution) |
|----------------------------------------------------|-------------------------------------------------------------------------------------------------------------------------------------------------------------------------|----------------------------------------------------------------------------------------------|-------------------------------------------------------------------------------------|
| Time frame: Since the initial planning of the work |                                                                                                                                                                         |                                                                                              |                                                                                     |
| 1                                                  | All support for the present manuscript (e.g., funding, provision of study materials, medical writing, article processing charges, etc.)<br>No time limit for this item. | ____ None                                                                                    |                                                                                     |
| Time frame: past 36 months                         |                                                                                                                                                                         |                                                                                              |                                                                                     |
| 2                                                  | Grants or contracts from any entity (if not indicated in item #1 above).                                                                                                | ____ None                                                                                    |                                                                                     |
| 3                                                  | Royalties or licenses                                                                                                                                                   | ____ None                                                                                    |                                                                                     |
| 4                                                  | Consulting fees                                                                                                                                                         | ____ None                                                                                    |                                                                                     |
| 5                                                  | Payment or honoraria for lectures, presentations, speakers bureaus, manuscript writing or educational events                                                            | ____ None                                                                                    |                                                                                     |
| 6                                                  | Payment for expert testimony                                                                                                                                            | ____ None                                                                                    |                                                                                     |
| 7                                                  | Support for attending meetings and/or travel                                                                                                                            | ____ None                                                                                    |                                                                                     |
| 8                                                  | Patents planned, issued or pending                                                                                                                                      | ____ None                                                                                    |                                                                                     |
| 9                                                  | Participation on a Data                                                                                                                                                 | ____ None                                                                                    |                                                                                     |

|    |                                                                                                   |                               |  |
|----|---------------------------------------------------------------------------------------------------|-------------------------------|--|
|    | Safety Monitoring Board or Advisory Board                                                         |                               |  |
| 10 | Leadership or fiduciary role in other board, society, committee or advocacy group, paid or unpaid | <input type="checkbox"/> None |  |
| 11 | Stock or stock options                                                                            | <input type="checkbox"/> None |  |
| 12 | Receipt of equipment, materials, drugs, medical writing, gifts or other services                  | <input type="checkbox"/> None |  |
| 13 | Other financial or non-financial interests                                                        | <input type="checkbox"/> None |  |

Please summarize the above conflict of interest in the following box:

None.

Please place an "X" next to the following statement to indicate your agreement:

I certify that I have answered every question and have not altered the wording of any of the questions on this form.

ICMJE DISCLOSURE FORM-11

Date: May 22<sup>th</sup>, 2023

Your Name: Harushi Ueno

Manuscript Title: Prognostic Impact of Highly Solid Component in Early-Stage Solid Lung Adenocarcinoma

Manuscript number (if known): QIMS-23-36-R2

In the interest of transparency, we ask you to disclose all relationships/activities/interests listed below that are related to the content of your manuscript. "Related" means any relation with for-profit or not-for-profit third parties whose interests may be affected by the content of the manuscript. Disclosure represents a commitment

to transparency and does not necessarily indicate a bias. If you are in doubt about whether to list a relationship/activity/interest, it is preferable that you do so.

The following questions apply to the author’s relationships/activities/interests as they relate to the current manuscript only.

The author’s relationships/activities/interests should be defined broadly. For example, if your manuscript pertains to the epidemiology of hypertension, you should declare all relationships with manufacturers of antihypertensive medication, even if that medication is not mentioned in the manuscript.

In item #1 below, report all support for the work reported in this manuscript without time limit. For all other items, the time frame for disclosure is the past 36 months.

|                                                           |                                                                                                                                                                         | Name all entities with whom you have this relationship or indicate none (add rows as needed) | Specifications/Comments (e.g., if payments were made to you or to your institution) |
|-----------------------------------------------------------|-------------------------------------------------------------------------------------------------------------------------------------------------------------------------|----------------------------------------------------------------------------------------------|-------------------------------------------------------------------------------------|
| <b>Time frame: Since the initial planning of the work</b> |                                                                                                                                                                         |                                                                                              |                                                                                     |
| 1                                                         | All support for the present manuscript (e.g., funding, provision of study materials, medical writing, article processing charges, etc.)<br>No time limit for this item. | ___ None                                                                                     |                                                                                     |
| <b>Time frame: past 36 months</b>                         |                                                                                                                                                                         |                                                                                              |                                                                                     |
| 2                                                         | Grants or contracts from any entity (if not indicated in item #1 above).                                                                                                | ___ None                                                                                     |                                                                                     |
| 3                                                         | Royalties or licenses                                                                                                                                                   | ___ None                                                                                     |                                                                                     |
| 4                                                         | Consulting fees                                                                                                                                                         | ___ None                                                                                     |                                                                                     |
| 5                                                         | Payment or honoraria for lectures, presentations, speakers bureaus, manuscript writing or educational events                                                            | ___ None                                                                                     |                                                                                     |
| 6                                                         | Payment for expert testimony                                                                                                                                            | ___ None                                                                                     |                                                                                     |
| 7                                                         | Support for attending                                                                                                                                                   | ___ None                                                                                     |                                                                                     |

|    |                                                                                                   |                  |  |
|----|---------------------------------------------------------------------------------------------------|------------------|--|
|    | meetings and/or travel                                                                            |                  |  |
| 8  | Patents planned, issued or pending                                                                | <u>    </u> None |  |
| 9  | Participation on a Data Safety Monitoring Board or Advisory Board                                 | <u>    </u> None |  |
| 10 | Leadership or fiduciary role in other board, society, committee or advocacy group, paid or unpaid | <u>    </u> None |  |
| 11 | Stock or stock options                                                                            | <u>    </u> None |  |
| 12 | Receipt of equipment, materials, drugs, medical writing, gifts or other services                  | <u>    </u> None |  |
| 13 | Other financial or non-financial interests                                                        | <u>    </u> None |  |

Please summarize the above conflict of interest in the following box:

None.

Please place an "X" next to the following statement to indicate your agreement:

I certify that I have answered every question and have not altered the wording of any of the questions on this form.

ICMJE DISCLOSURE FORM-12

Date: May 22<sup>th</sup>, 2023

Your Name: Naoki Ozeki

Manuscript Title: Prognostic Impact of Highly Solid Component in Early-Stage Solid Lung Adenocarcinoma

Manuscript number (if known): QIMS-23-36-R2



In the interest of transparency, we ask you to disclose all relationships/activities/interests listed below that are related to the content of your manuscript. "Related" means any relation with for-profit or not-for-profit third parties whose interests may be affected by the content of the manuscript. Disclosure represents a commitment to transparency and does not necessarily indicate a bias. If you are in doubt about whether to list a relationship/activity/interest, it is preferable that you do so.

The following questions apply to the author's relationships/activities/interests as they relate to the current manuscript only.

The author's relationships/activities/interests should be defined broadly. For example, if your manuscript pertains to the epidemiology of hypertension, you should declare all relationships with manufacturers of antihypertensive medication, even if that medication is not mentioned in the manuscript.

In item #1 below, report all support for the work reported in this manuscript without time limit. For all other items, the time frame for disclosure is the past 36 months.

|                                                           |                                                                                                                                                                         | Name all entities with whom you have this relationship or indicate none (add rows as needed) | Specifications/Comments (e.g., if payments were made to you or to your institution) |
|-----------------------------------------------------------|-------------------------------------------------------------------------------------------------------------------------------------------------------------------------|----------------------------------------------------------------------------------------------|-------------------------------------------------------------------------------------|
| <b>Time frame: Since the initial planning of the work</b> |                                                                                                                                                                         |                                                                                              |                                                                                     |
| 1                                                         | All support for the present manuscript (e.g., funding, provision of study materials, medical writing, article processing charges, etc.)<br>No time limit for this item. | ___ None                                                                                     |                                                                                     |
| <b>Time frame: past 36 months</b>                         |                                                                                                                                                                         |                                                                                              |                                                                                     |
| 2                                                         | Grants or contracts from any entity (if not indicated in item #1 above).                                                                                                | ___ None                                                                                     |                                                                                     |
| 3                                                         | Royalties or licenses                                                                                                                                                   | ___ None                                                                                     |                                                                                     |
| 4                                                         | Consulting fees                                                                                                                                                         | ___ None                                                                                     |                                                                                     |
| 5                                                         | Payment or honoraria for                                                                                                                                                | ___ None                                                                                     |                                                                                     |

|    |                                                                                                   |          |  |
|----|---------------------------------------------------------------------------------------------------|----------|--|
|    | lectures, presentations, speakers bureaus, manuscript writing or educational events               |          |  |
| 6  | Payment for expert testimony                                                                      | ___ None |  |
| 7  | Support for attending meetings and/or travel                                                      | ___ None |  |
| 8  | Patents planned, issued or pending                                                                | ___ None |  |
| 9  | Participation on a Data Safety Monitoring Board or Advisory Board                                 | ___ None |  |
| 10 | Leadership or fiduciary role in other board, society, committee or advocacy group, paid or unpaid | ___ None |  |
| 11 | Stock or stock options                                                                            | ___ None |  |
| 12 | Receipt of equipment, materials, drugs, medical writing, gifts or other services                  | ___ None |  |
| 13 | Other financial or non-financial interests                                                        | ___ None |  |

Please summarize the above conflict of interest in the following box:

None.

Please place an "X" next to the following statement to indicate your agreement:

I certify that I have answered every question and have not altered the wording of any of the questions on this

form.

## ICMJE DISCLOSURE FORM-13

Date: May 22<sup>th</sup>, 2023

Your Name: Shota Nakamura

Manuscript Title: Prognostic Impact of Highly Solid Component in Early-Stage Solid Lung Adenocarcinoma

Manuscript number (if known): QIMS-23-36-R2

In the interest of transparency, we ask you to disclose all relationships/activities/interests listed below that are related to the content of your manuscript. "Related" means any relation with for-profit or not-for-profit third parties whose interests may be affected by the content of the manuscript. Disclosure represents a commitment to transparency and does not necessarily indicate a bias. If you are in doubt about whether to list a relationship/activity/interest, it is preferable that you do so.

The following questions apply to the author's relationships/activities/interests as they relate to the current manuscript only.

The author's relationships/activities/interests should be defined broadly. For example, if your manuscript pertains to the epidemiology of hypertension, you should declare all relationships with manufacturers of antihypertensive medication, even if that medication is not mentioned in the manuscript.

In item #1 below, report all support for the work reported in this manuscript without time limit. For all other items, the time frame for disclosure is the past 36 months.

|                                                           |                                                                                                                                                                         | Name all entities with whom you have this relationship or indicate none (add rows as needed) | Specifications/Comments (e.g., if payments were made to you or to your institution) |
|-----------------------------------------------------------|-------------------------------------------------------------------------------------------------------------------------------------------------------------------------|----------------------------------------------------------------------------------------------|-------------------------------------------------------------------------------------|
| <b>Time frame: Since the initial planning of the work</b> |                                                                                                                                                                         |                                                                                              |                                                                                     |
| 1                                                         | All support for the present manuscript (e.g., funding, provision of study materials, medical writing, article processing charges, etc.)<br>No time limit for this item. | ___ None                                                                                     |                                                                                     |
|                                                           |                                                                                                                                                                         |                                                                                              |                                                                                     |
|                                                           |                                                                                                                                                                         |                                                                                              |                                                                                     |
|                                                           |                                                                                                                                                                         |                                                                                              |                                                                                     |
|                                                           |                                                                                                                                                                         |                                                                                              |                                                                                     |
|                                                           |                                                                                                                                                                         |                                                                                              |                                                                                     |
| <b>Time frame: past 36 months</b>                         |                                                                                                                                                                         |                                                                                              |                                                                                     |
| 2                                                         | Grants or contracts from                                                                                                                                                | ___ None                                                                                     |                                                                                     |

|    |                                                                                                              |          |  |
|----|--------------------------------------------------------------------------------------------------------------|----------|--|
|    | any entity (if not indicated in item #1 above).                                                              |          |  |
| 3  | Royalties or licenses                                                                                        | ___ None |  |
| 4  | Consulting fees                                                                                              | ___ None |  |
| 5  | Payment or honoraria for lectures, presentations, speakers bureaus, manuscript writing or educational events | ___ None |  |
| 6  | Payment for expert testimony                                                                                 | ___ None |  |
| 7  | Support for attending meetings and/or travel                                                                 | ___ None |  |
| 8  | Patents planned, issued or pending                                                                           | ___ None |  |
| 9  | Participation on a Data Safety Monitoring Board or Advisory Board                                            | ___ None |  |
| 10 | Leadership or fiduciary role in other board, society, committee or advocacy group, paid or unpaid            | ___ None |  |
| 11 | Stock or stock options                                                                                       | ___ None |  |
| 12 | Receipt of equipment, materials, drugs, medical writing, gifts or other services                             | ___ None |  |
| 13 | Other financial or non-financial interests                                                                   | ___ None |  |

Please summarize the above conflict of interest in the following box:

None.

Please place an "X" next to the following statement to indicate your agreement:

I certify that I have answered every question and have not altered the wording of any of the questions on this form.

ICMJE DISCLOSURE FORM-14

Date: May 22<sup>th</sup>, 2023

Your Name: Koichi Fukumoto

Manuscript Title: Prognostic Impact of Highly Solid Component in Early-Stage Solid Lung Adenocarcinoma

Manuscript number (if known): QIMS-23-36-R2

In the interest of transparency, we ask you to disclose all relationships/activities/interests listed below that are related to the content of your manuscript. "Related" means any relation with for-profit or not-for-profit third parties whose interests may be affected by the content of the manuscript. Disclosure represents a commitment to transparency and does not necessarily indicate a bias. If you are in doubt about whether to list a relationship/activity/interest, it is preferable that you do so.

The following questions apply to the author's relationships/activities/interests as they relate to the current manuscript only.

The author's relationships/activities/interests should be defined broadly. For example, if your manuscript pertains to the epidemiology of hypertension, you should declare all relationships with manufacturers of antihypertensive medication, even if that medication is not mentioned in the manuscript.

In item #1 below, report all support for the work reported in this manuscript without time limit. For all other items, the time frame for disclosure is the past 36 months.

|                                                    |                     | Name all entities with whom you have this relationship or indicate none (add rows as needed) | Specifications/Comments (e.g., if payments were made to you or to your institution) |
|----------------------------------------------------|---------------------|----------------------------------------------------------------------------------------------|-------------------------------------------------------------------------------------|
| Time frame: Since the initial planning of the work |                     |                                                                                              |                                                                                     |
| 1                                                  | All support for the | None                                                                                         |                                                                                     |

|                                   |                                                                                                                                                     |          |  |
|-----------------------------------|-----------------------------------------------------------------------------------------------------------------------------------------------------|----------|--|
|                                   | present manuscript (e.g., funding, provision of study materials, medical writing, article processing charges, etc.)<br>No time limit for this item. |          |  |
| <b>Time frame: past 36 months</b> |                                                                                                                                                     |          |  |
| 2                                 | Grants or contracts from any entity (if not indicated in item #1 above).                                                                            | ___ None |  |
| 3                                 | Royalties or licenses                                                                                                                               | ___ None |  |
| 4                                 | Consulting fees                                                                                                                                     | ___ None |  |
| 5                                 | Payment or honoraria for lectures, presentations, speakers bureaus, manuscript writing or educational events                                        | ___ None |  |
| 6                                 | Payment for expert testimony                                                                                                                        | ___ None |  |
| 7                                 | Support for attending meetings and/or travel                                                                                                        | ___ None |  |
| 8                                 | Patents planned, issued or pending                                                                                                                  | ___ None |  |
| 9                                 | Participation on a Data Safety Monitoring Board or Advisory Board                                                                                   | ___ None |  |
| 10                                | Leadership or fiduciary role in other board, society, committee or advocacy group, paid or unpaid                                                   | ___ None |  |
| 11                                | Stock or stock options                                                                                                                              | ___ None |  |
| 12                                | Receipt of equipment, materials, drugs, medical writing, gifts or other services                                                                    | ___ None |  |
| 13                                | Other financial or non-financial interests                                                                                                          | ___ None |  |

Please summarize the above conflict of interest in the following box:

|       |
|-------|
| None. |
|-------|

Please place an "X" next to the following statement to indicate your agreement:

I certify that I have answered every question and have not altered the wording of any of the questions on this form.

ICMJE DISCLOSURE FORM-15

Date: May 22<sup>th</sup>, 2023

Your Name: Tamotsu Takeuchi

Manuscript Title: Prognostic Impact of Highly Solid Component in Early-Stage Solid Lung Adenocarcinoma

Manuscript number (if known): QIMS-23-36-R2

In the interest of transparency, we ask you to disclose all relationships/activities/interests listed below that are related to the content of your manuscript. "Related" means any relation with for-profit or not-for-profit third parties whose interests may be affected by the content of the manuscript. Disclosure represents a commitment to transparency and does not necessarily indicate a bias. If you are in doubt about whether to list a relationship/activity/interest, it is preferable that you do so.

The following questions apply to the author's relationships/activities/interests as they relate to the current manuscript only.

The author's relationships/activities/interests should be defined broadly. For example, if your manuscript pertains to the epidemiology of hypertension, you should declare all relationships with manufacturers of antihypertensive medication, even if that medication is not mentioned in the manuscript.

In item #1 below, report all support for the work reported in this manuscript without time limit. For all other items, the time frame for disclosure is the past 36 months.

|                                                    |                                                                                                                                                                         | Name all entities with whom you have this relationship or indicate none (add rows as needed) | Specifications/Comments (e.g., if payments were made to you or to your institution) |
|----------------------------------------------------|-------------------------------------------------------------------------------------------------------------------------------------------------------------------------|----------------------------------------------------------------------------------------------|-------------------------------------------------------------------------------------|
| Time frame: Since the initial planning of the work |                                                                                                                                                                         |                                                                                              |                                                                                     |
| 1                                                  | All support for the present manuscript (e.g., funding, provision of study materials, medical writing, article processing charges, etc.)<br>No time limit for this item. | ___ None                                                                                     |                                                                                     |
|                                                    |                                                                                                                                                                         |                                                                                              |                                                                                     |
|                                                    |                                                                                                                                                                         |                                                                                              |                                                                                     |
|                                                    |                                                                                                                                                                         |                                                                                              |                                                                                     |
|                                                    |                                                                                                                                                                         |                                                                                              |                                                                                     |
| Time frame: past 36 months                         |                                                                                                                                                                         |                                                                                              |                                                                                     |
| 2                                                  | Grants or contracts from any entity (if not indicated in item #1 above).                                                                                                | ___ None                                                                                     |                                                                                     |
|                                                    |                                                                                                                                                                         |                                                                                              |                                                                                     |
|                                                    |                                                                                                                                                                         |                                                                                              |                                                                                     |
| 3                                                  | Royalties or licenses                                                                                                                                                   | ___ None                                                                                     |                                                                                     |
|                                                    |                                                                                                                                                                         |                                                                                              |                                                                                     |
|                                                    |                                                                                                                                                                         |                                                                                              |                                                                                     |
| 4                                                  | Consulting fees                                                                                                                                                         | ___ None                                                                                     |                                                                                     |
|                                                    |                                                                                                                                                                         |                                                                                              |                                                                                     |
|                                                    |                                                                                                                                                                         |                                                                                              |                                                                                     |
| 5                                                  | Payment or honoraria for lectures, presentations, speakers bureaus, manuscript writing or educational events                                                            | ___ None                                                                                     |                                                                                     |
|                                                    |                                                                                                                                                                         |                                                                                              |                                                                                     |
|                                                    |                                                                                                                                                                         |                                                                                              |                                                                                     |
| 6                                                  | Payment for expert testimony                                                                                                                                            | ___ None                                                                                     |                                                                                     |
|                                                    |                                                                                                                                                                         |                                                                                              |                                                                                     |
|                                                    |                                                                                                                                                                         |                                                                                              |                                                                                     |
| 7                                                  | Support for attending meetings and/or travel                                                                                                                            | ___ None                                                                                     |                                                                                     |
|                                                    |                                                                                                                                                                         |                                                                                              |                                                                                     |
|                                                    |                                                                                                                                                                         |                                                                                              |                                                                                     |
| 8                                                  | Patents planned, issued or pending                                                                                                                                      | ___ None                                                                                     |                                                                                     |
|                                                    |                                                                                                                                                                         |                                                                                              |                                                                                     |
|                                                    |                                                                                                                                                                         |                                                                                              |                                                                                     |
| 9                                                  | Participation on a Data Safety Monitoring Board or Advisory Board                                                                                                       | ___ None                                                                                     |                                                                                     |
|                                                    |                                                                                                                                                                         |                                                                                              |                                                                                     |
|                                                    |                                                                                                                                                                         |                                                                                              |                                                                                     |
| 10                                                 | Leadership or fiduciary role in other board, society, committee or advocacy group, paid or unpaid                                                                       | ___ None                                                                                     |                                                                                     |
|                                                    |                                                                                                                                                                         |                                                                                              |                                                                                     |
|                                                    |                                                                                                                                                                         |                                                                                              |                                                                                     |
| 11                                                 | Stock or stock options                                                                                                                                                  | ___ None                                                                                     |                                                                                     |
|                                                    |                                                                                                                                                                         |                                                                                              |                                                                                     |



|    |                                                                                  |           |  |
|----|----------------------------------------------------------------------------------|-----------|--|
|    |                                                                                  |           |  |
| 12 | Receipt of equipment, materials, drugs, medical writing, gifts or other services | ____ None |  |
|    |                                                                                  |           |  |
| 13 | Other financial or non-financial interests                                       | ____ None |  |
|    |                                                                                  |           |  |

Please summarize the above conflict of interest in the following box:

None.

Please place an "X" next to the following statement to indicate your agreement:

I certify that I have answered every question and have not altered the wording of any of the questions on this form.

ICMJE DISCLOSURE FORM-16

Date: May 22<sup>th</sup>, 2023

Your Name: Kenosuke Karube

Manuscript Title: Prognostic Impact of Highly Solid Component in Early-Stage Solid Lung Adenocarcinoma

Manuscript number (if known): QIMS-23-36-R2

In the interest of transparency, we ask you to disclose all relationships/activities/interests listed below that are related to the content of your manuscript. "Related" means any relation with for-profit or not-for-profit third parties whose interests may be affected by the content of the manuscript. Disclosure represents a commitment to transparency and does not necessarily indicate a bias. If you are in doubt about whether to list a relationship/activity/interest, it is preferable that you do so.

The following questions apply to the author's relationships/activities/interests as they relate to the current manuscript only.

The author's relationships/activities/interests should be defined broadly. For example, if your manuscript pertains to the epidemiology of hypertension, you should declare all relationships with manufacturers of antihypertensive medication, even if that medication is not mentioned in the manuscript.

In item #1 below, report all support for the work reported in this manuscript without time limit. For all other items, the time frame for disclosure is the past 36 months.

|                                                    |                                                                                                                                                                         | Name all entities with whom you have this relationship or indicate none (add rows as needed) | Specifications/Comments (e.g., if payments were made to you or to your institution) |
|----------------------------------------------------|-------------------------------------------------------------------------------------------------------------------------------------------------------------------------|----------------------------------------------------------------------------------------------|-------------------------------------------------------------------------------------|
| Time frame: Since the initial planning of the work |                                                                                                                                                                         |                                                                                              |                                                                                     |
| 1                                                  | All support for the present manuscript (e.g., funding, provision of study materials, medical writing, article processing charges, etc.)<br>No time limit for this item. | ___ None                                                                                     |                                                                                     |
| Time frame: past 36 months                         |                                                                                                                                                                         |                                                                                              |                                                                                     |
| 2                                                  | Grants or contracts from any entity (if not indicated in item #1 above).                                                                                                | ___ None                                                                                     |                                                                                     |
| 3                                                  | Royalties or licenses                                                                                                                                                   | ___ None                                                                                     |                                                                                     |
| 4                                                  | Consulting fees                                                                                                                                                         | ___ None                                                                                     |                                                                                     |
| 5                                                  | Payment or honoraria for lectures, presentations, speakers bureaus, manuscript writing or educational events                                                            | ___ None                                                                                     |                                                                                     |
| 6                                                  | Payment for expert testimony                                                                                                                                            | ___ None                                                                                     |                                                                                     |
| 7                                                  | Support for attending meetings and/or travel                                                                                                                            | ___ None                                                                                     |                                                                                     |
| 8                                                  | Patents planned, issued or pending                                                                                                                                      | ___ None                                                                                     |                                                                                     |
| 9                                                  | Participation on a Data                                                                                                                                                 | ___ None                                                                                     |                                                                                     |

|    |                                                                                                   |          |  |
|----|---------------------------------------------------------------------------------------------------|----------|--|
|    | Safety Monitoring Board or Advisory Board                                                         |          |  |
| 10 | Leadership or fiduciary role in other board, society, committee or advocacy group, paid or unpaid | ___ None |  |
| 11 | Stock or stock options                                                                            | ___ None |  |
| 12 | Receipt of equipment, materials, drugs, medical writing, gifts or other services                  | ___ None |  |
| 13 | Other financial or non-financial interests                                                        | ___ None |  |

Please summarize the above conflict of interest in the following box:

None.

Please place an "X" next to the following statement to indicate your agreement:

I certify that I have answered every question and have not altered the wording of any of the questions on this form.

ICMJE DISCLOSURE FORM-17

Date: May 22<sup>th</sup>, 2023

Your Name: Shigeyuki Matsui

Manuscript Title: Prognostic Impact of Highly Solid Component in Early-Stage Solid Lung Adenocarcinoma

Manuscript number (if known): QIMS-23-36-R2

In the interest of transparency, we ask you to disclose all relationships/activities/interests listed below that are related to the content of your manuscript. "Related" means any relation with for-profit or not-for-profit third parties whose interests may be affected by the content of the manuscript. Disclosure represents a commitment

to transparency and does not necessarily indicate a bias. If you are in doubt about whether to list a relationship/activity/interest, it is preferable that you do so.

The following questions apply to the author’s relationships/activities/interests as they relate to the current manuscript only.

The author’s relationships/activities/interests should be defined broadly. For example, if your manuscript pertains to the epidemiology of hypertension, you should declare all relationships with manufacturers of antihypertensive medication, even if that medication is not mentioned in the manuscript.

In item #1 below, report all support for the work reported in this manuscript without time limit. For all other items, the time frame for disclosure is the past 36 months.

|                                                           |                                                                                                                                                                         | Name all entities with whom you have this relationship or indicate none (add rows as needed) | Specifications/Comments (e.g., if payments were made to you or to your institution) |
|-----------------------------------------------------------|-------------------------------------------------------------------------------------------------------------------------------------------------------------------------|----------------------------------------------------------------------------------------------|-------------------------------------------------------------------------------------|
| <b>Time frame: Since the initial planning of the work</b> |                                                                                                                                                                         |                                                                                              |                                                                                     |
| 1                                                         | All support for the present manuscript (e.g., funding, provision of study materials, medical writing, article processing charges, etc.)<br>No time limit for this item. | ___ None                                                                                     |                                                                                     |
| <b>Time frame: past 36 months</b>                         |                                                                                                                                                                         |                                                                                              |                                                                                     |
| 2                                                         | Grants or contracts from any entity (if not indicated in item #1 above).                                                                                                | ___ None                                                                                     |                                                                                     |
| 3                                                         | Royalties or licenses                                                                                                                                                   | ___ None                                                                                     |                                                                                     |
| 4                                                         | Consulting fees                                                                                                                                                         | ___ None                                                                                     |                                                                                     |
| 5                                                         | Payment or honoraria for lectures, presentations, speakers bureaus, manuscript writing or educational events                                                            | ___ None                                                                                     |                                                                                     |
| 6                                                         | Payment for expert testimony                                                                                                                                            | ___ None                                                                                     |                                                                                     |
| 7                                                         | Support for attending                                                                                                                                                   | ___ None                                                                                     |                                                                                     |

|    |                                                                                                   |                  |  |
|----|---------------------------------------------------------------------------------------------------|------------------|--|
|    | meetings and/or travel                                                                            |                  |  |
| 8  | Patents planned, issued or pending                                                                | <u>    </u> None |  |
| 9  | Participation on a Data Safety Monitoring Board or Advisory Board                                 | <u>    </u> None |  |
| 10 | Leadership or fiduciary role in other board, society, committee or advocacy group, paid or unpaid | <u>    </u> None |  |
| 11 | Stock or stock options                                                                            | <u>    </u> None |  |
| 12 | Receipt of equipment, materials, drugs, medical writing, gifts or other services                  | <u>    </u> None |  |
| 13 | Other financial or non-financial interests                                                        | <u>    </u> None |  |

Please summarize the above conflict of interest in the following box:

None.

Please place an "X" next to the following statement to indicate your agreement:

I certify that I have answered every question and have not altered the wording of any of the questions on this form.

ICMJE DISCLOSURE FORM-18

Date: May 22<sup>th</sup>, 2023

Your Name: Toyofumi Fengshi Chen-Yoshikawa

Manuscript Title: Prognostic Impact of Highly Solid Component in Early-Stage Solid Lung Adenocarcinoma

Manuscript number (if known): QIMS-23-36-R2

In the interest of transparency, we ask you to disclose all relationships/activities/interests listed below that are related to the content of your manuscript. "Related" means any relation with for-profit or not-for-profit third parties whose interests may be affected by the content of the manuscript. Disclosure represents a commitment to transparency and does not necessarily indicate a bias. If you are in doubt about whether to list a relationship/activity/interest, it is preferable that you do so.

The following questions apply to the author's relationships/activities/interests as they relate to the current manuscript only.

The author's relationships/activities/interests should be defined broadly. For example, if your manuscript pertains to the epidemiology of hypertension, you should declare all relationships with manufacturers of antihypertensive medication, even if that medication is not mentioned in the manuscript.

In item #1 below, report all support for the work reported in this manuscript without time limit. For all other items, the time frame for disclosure is the past 36 months.

|                                                           |                                                                                                                                                                         | Name all entities with whom you have this relationship or indicate none (add rows as needed) | Specifications/Comments (e.g., if payments were made to you or to your institution) |
|-----------------------------------------------------------|-------------------------------------------------------------------------------------------------------------------------------------------------------------------------|----------------------------------------------------------------------------------------------|-------------------------------------------------------------------------------------|
| <b>Time frame: Since the initial planning of the work</b> |                                                                                                                                                                         |                                                                                              |                                                                                     |
| 1                                                         | All support for the present manuscript (e.g., funding, provision of study materials, medical writing, article processing charges, etc.)<br>No time limit for this item. | ___ None                                                                                     |                                                                                     |
| <b>Time frame: past 36 months</b>                         |                                                                                                                                                                         |                                                                                              |                                                                                     |
| 2                                                         | Grants or contracts from any entity (if not indicated in item #1 above).                                                                                                | ___ None                                                                                     |                                                                                     |
| 3                                                         | Royalties or licenses                                                                                                                                                   | ___ None                                                                                     |                                                                                     |
| 4                                                         | Consulting fees                                                                                                                                                         | ___ None                                                                                     |                                                                                     |
| 5                                                         | Payment or honoraria for                                                                                                                                                | ___ None                                                                                     |                                                                                     |

|    |                                                                                                   |          |  |
|----|---------------------------------------------------------------------------------------------------|----------|--|
|    | lectures, presentations, speakers bureaus, manuscript writing or educational events               |          |  |
| 6  | Payment for expert testimony                                                                      | ___ None |  |
| 7  | Support for attending meetings and/or travel                                                      | ___ None |  |
| 8  | Patents planned, issued or pending                                                                | ___ None |  |
| 9  | Participation on a Data Safety Monitoring Board or Advisory Board                                 | ___ None |  |
| 10 | Leadership or fiduciary role in other board, society, committee or advocacy group, paid or unpaid | ___ None |  |
| 11 | Stock or stock options                                                                            | ___ None |  |
| 12 | Receipt of equipment, materials, drugs, medical writing, gifts or other services                  | ___ None |  |
| 13 | Other financial or non-financial interests                                                        | ___ None |  |

Please summarize the above conflict of interest in the following box:

None.

Please place an "X" next to the following statement to indicate your agreement:

I certify that I have answered every question and have not altered the wording of any of the questions on this

form.
