# Supplementary material for: Prognostic impact of highly solid component in early-stage solid lung adenocarcinoma
Source: PubMed Central journal article supplement — Quant Imaging Med Surg. 2023 Jul 24;13(9):5641–52. doi: 10.21037/qims-23-36 (PMC10498257; doi:10.21037/qims-23-36), 2023-07-24
Supplement: qims-13-09-5641-supplementary.pdf [file qims-13-09-5641-supplementary.pdf]

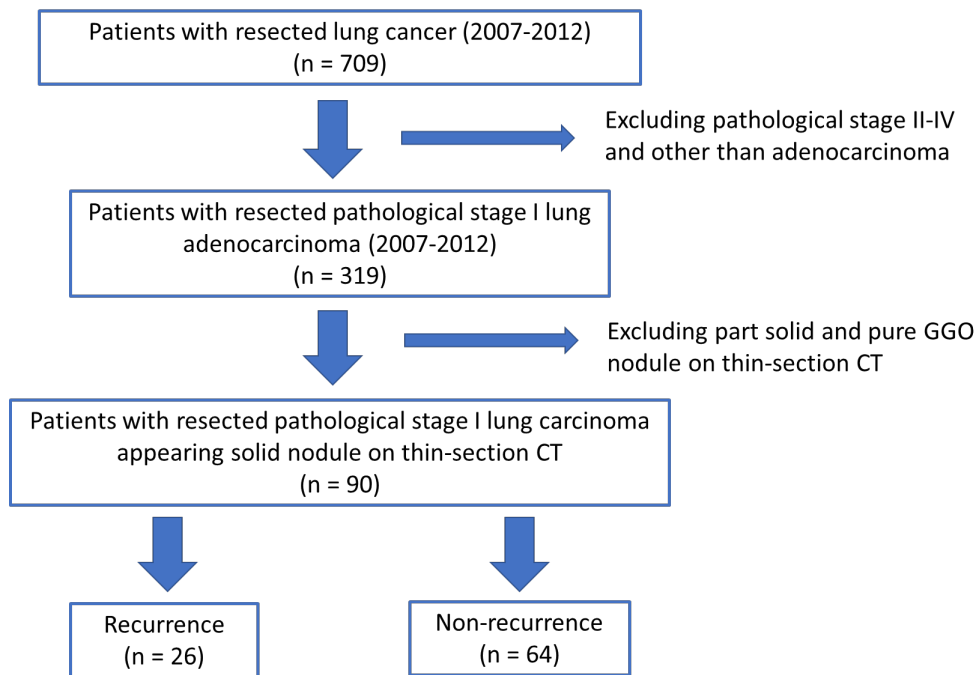

**Figure S1** Flowchart of study population. GGO, ground-glass opacity; CT, computed tomography.

**Table S1** Patient background (n=90)

| Variable                         | Number of patients |
|----------------------------------|--------------------|
| <b>Demographics</b>              |                    |
| Age (y)                          | 68 [61–72]         |
| SUVmax on FDG-PET                | 5.10 [3.38–7.13]   |
| Serum CEA level                  | 3.9 [2.1–7.6]      |
| Sex (male), n (%)                | 61 (67.8)          |
| <b>Smoking, n (%)</b>            |                    |
| Non-smoker                       | 32 (35.6)          |
| Ex-smoker                        | 37 (41.1)          |
| Current smoker                   | 21 (23.3)          |
| <b>Surgical procedure, n (%)</b> |                    |
| Lobectomy                        | 80 (88.9)          |
| Segmentectomy/sublobar           | 10 (11.1)          |
| <b>EGFR, n (%)</b>               |                    |
| Mutant                           | 27 (30.0)          |
| WT                               | 63 (70.0)          |

Data are shown as median [IQR] or n (%). SUVmax, maximum standard uptake value; FDG PET, [<sup>18</sup>F] fluorodeoxyglucose positron emission tomography; CEA, carcinoembryonic antigen; EGFR, epidermal growth factor receptor; WT, wild type; IQR, interquartile range.

**Table S2** The distribution of 3DSV in patients with recurrence and non-recurrence

| Variables*                      | Recurrence (n=26), n [%] | Non-recurrence (n=64), n [%] |
|---------------------------------|--------------------------|------------------------------|
| 0–520 (mm <sup>3</sup> )        | 1 [4]                    | 12 [19]                      |
| 520–4,180 (mm <sup>3</sup> )    | 14 [54]                  | 39 [61]                      |
| 4,180–14,130 (mm <sup>3</sup> ) | 9 [35]                   | 13 [20]                      |
| 14,130– (mm <sup>3</sup> )      | 2 [7]                    | 0 [0]                        |

\*, this category was separated by converted tumor diameter. 520 mm<sup>3</sup>, 4,180 mm<sup>3</sup> and 14,130 mm<sup>3</sup> correspond to 10 mm, 20 mm and 30 mm in converted diameter, respectively. 3DSV, three-dimensional solid volume between 0 and 199 HU.
